# Supplementary material for: Temporal and geographic analysis of human trichinellosis incidence in Chile with risk assessment
Source: Research Square preprint supplement (doi:10.21203/rs.3.rs-346263/v1), 2021-03-22
Supplement: Supplementary file 1 [file 4ca446f34d3c941049a7bb23.xlsx]

## Sheet: Hoja1
Table S1. Details of the number of cases and incidence rates per commune of Chile and year.
Region	Province	Commune	2010	2011	2012	2013	2014	2015	2016	2017	2018	2019	Total	Population 2017	Incidence
País													287	17574003	1.63309
XV													0	226068	0
Arica	Parinacota	Putre	0	0	0	0	0	0	0	0	0	0	0	1	0
Arica	Parinacota	General lagos	0	0	0	0	0	0	0	0	0	0	0	1	0
Arica	Arica	Arica	0	0	0	0	0	0	0	0	0	0	0	1	0
Arica	Arica	Camarones	0	0	0	0	0	0	0	0	0	0	0	1	0
I													0	330558	0
Tarapacá	Iquique	Alto Hospicio	0	0	0	0	0	0	0	0	0	0	0	1	0
Tarapacá	Iquique	Iquique	0	0	0	0	0	0	0	0	0	0	0	1	0
Tarapacá	El Tamarugal	Camiña	0	0	0	0	0	0	0	0	0	0	0	1	0
Tarapacá	El Tamarugal	Colchane	0	0	0	0	0	0	0	0	0	0	0	1	0
II													2	607534	0.3292
Antofagasta	Antofagasta	Antofagasta	0	0	0	0	0	0	0	0	0	0	0	1	0
Antofagasta	Antofagasta	Mejillones	0	0	0	0	0	0	0	0	0	0	0	1	0
Antofagasta	Antofagasta	sierra Gorda	0	0	0	0	0	0	0	0	0	0	0	1	0
Antofagasta	Antofagasta	Taltal	0	0	0	0	0	0	1	0	0	0	1	13317	7.5092
Antofagasta	Calama	Calama	0	0	0	0	0	0	0	0	0	0	0	1	0
Antofagasta	Calama	Ollagüe	0	0	0	0	0	0	0	0	0	0	0	1	0
Antofagasta	Calama	San Pedro de Atacama	0	0	0	0	0	0	0	0	0	0	0	1	0
Antofagasta	Tocopilla	María Elena	0	0	0	0	0	0	0	0	0	0	0	1	0
Antofagasta	Tocopilla	Tocopilla	0	0	0	1	0	0	0	0	0	0	1	25186	3.97046
III													1	286168	0.349445
Atacama	Chañaral	Chañaral	0	0	0	0	0	0	0	0	0	0	0	1	0
Atacama	Chañaral	Diego de Almagro	0	0	0	0	0	0	0	0	0	0	0	1	0
Atacama	Copiapó	Caldera	0	0	0	0	0	0	0	0	0	0	0	1	0
Atacama	Copiapó	Copiapó	0	0	0	0	0	0	0	0	1	0	1	153937	0.649616
Atacama	Copiapó	Tierra Amarilla	0	0	0	0	0	0	0	0	0	0	0	1	0
Atacama	Huasco	Alto del Carmen	0	0	0	0	0	0	0	0	0	0	0	1	0
Atacama	Huasco	Freirina	0	0	0	0	0	0	0	0	0	0	0	1	0
Atacama	Huasco	Huasco	0	0	0	0	0	0	0	0	0	0	0	1	0
Atacama	Huasco	Vallenar	0	0	0	0	0	0	0	0	0	0	0	1	0
IV													2	757586	0.263996
Coquimbo	Choapa	Canela	0	0	0	0	0	0	0	0	0	0	0	1	0
Coquimbo	Choapa	Illapel	0	0	0	0	0	0	0	0	0	0	0	1	0
Coquimbo	Choapa	Los Vilos	0	0	0	0	0	0	0	0	0	0	0	1	0
Coquimbo	Choapa	Salamanca	0	0	0	0	0	0	0	0	0	0	0	1	0
Coquimbo	Elqui	Andacollo	0	0	0	0	0	0	0	0	0	0	0	1	0
Coquimbo	Elqui	Coquimbo	0	1	0	0	0	0	0	0	0	0	1	227730	0.439116
Coquimbo	Elqui	La Higuera	0	0	0	0	0	0	0	0	0	0	0	1	0
Coquimbo	Elqui	La Serena	0	1	0	0	0	0	0	0	0	0	1	221054	0.452378
Coquimbo	Elqui	Paihuano	0	0	0	0	0	0	0	0	0	0	0	1	0
Coquimbo	Elqui	Vicuña	0	0	0	0	0	0	0	0	0	0	0	1	0
Coquimbo	Limarí	Combarbalá	0	0	0	0	0	0	0	0	0	0	0	1	0
Coquimbo	Limarí	Monte Patria	0	0	0	0	0	0	0	0	0	0	0	1	0
Coquimbo	Limarí	Ovalle	0	0	0	0	0	0	0	0	0	0	0	1	0
Coquimbo	Limarí	Punitaqui	0	0	0	0	0	0	0	0	0	0	0	1	0
Coquimbo	Limarí	Río hurtado	0	0	0	0	0	0	0	0	0	0	0	1	0
V													3	1815902	0.165207
Valparaíso	Los Andes	Calle Larga	0	0	0	0	0	0	0	0	0	0	0	1	0
Valparaíso	Los Andes	Los andes	0	0	0	0	0	0	0	0	0	0	0	1	0
Valparaíso	Los Andes	Rinconada	0	0	0	0	0	0	0	0	0	0	0	1	0
Valparaíso	Los Andes	San Esteban	0	0	0	0	0	0	0	0	0	0	0	1	0
Valparaíso	Petorca	Cabildo	0	0	0	0	0	0	0	0	0	0	0	1	0
Valparaíso	Petorca	La ligua	0	0	0	0	0	0	0	0	0	0	0	1	0
Valparaíso	Petorca	Papudo	0	0	0	0	0	0	0	0	0	0	0	1	0
Valparaíso	Petorca	Petorca	0	0	0	0	0	0	0	0	0	0	0	1	0
Valparaíso	Petorca	Zapallar	0	0	0	0	0	0	0	0	0	0	0	1	0
Valparaíso	Quillota	Hijuelas	0	0	0	0	0	0	0	0	0	0	0	1	0
Valparaíso	Quillota	La Calera	0	0	0	0	0	0	0	0	0	0	0	1	0
Valparaíso	Quillota	La Cruz	0	0	0	0	0	0	0	0	0	0	0	1	0
Valparaíso	Quillota	Nogales	0	0	0	0	0	0	0	0	0	0	0	1	0
Valparaíso	Quillota	Quillota	0	0	0	0	0	0	0	0	0	0	0	1	0
Valparaíso	San Antonio	Algarrobo	0	0	0	0	0	0	0	0	0	0	0	1	0
Valparaíso	San Antonio	Cartagena	0	0	0	0	0	0	0	0	0	0	0	1	0
Valparaíso	San Antonio	El Quisco	0	0	0	0	0	0	0	0	0	0	0	1	0
Valparaíso	San Antonio	El Tabo	0	0	0	0	0	0	0	0	0	0	0	1	0
Valparaíso	San Antonio	San Antonio	0	0	0	0	0	0	0	0	0	0	0	1	0
Valparaíso	San Antonio	Santo Domingo	0	0	0	0	0	0	0	0	0	0	0	1	0
Valparaíso	San Felipe	Catemu	0	0	0	0	0	0	0	0	0	0	0	1	0
Valparaíso	San Felipe	Llay-Llay	0	0	0	0	0	0	0	0	0	0	0	1	0
Valparaíso	San Felipe	Panquehue	0	0	0	0	0	0	0	0	0	0	0	1	0
Valparaíso	San Felipe	Putaendo	0	0	0	0	0	0	0	0	0	0	0	1	0
Valparaíso	San Felipe	San Felipe	0	0	0	0	0	0	0	0	0	0	0	1	0
Valparaíso	San Felipe	Santa María	0	0	0	0	0	0	0	0	0	0	0	1	0
Valparaíso	Valparaíso	Casablanca	0	0	0	0	0	0	0	0	0	0	0	1	0
Valparaíso	Valparaíso	Concón	0	0	0	0	0	0	0	0	0	0	0	1	0
Valparaíso	Valparaíso	Juan Fernández	0	0	0	0	0	0	0	0	0	0	0	1	0
Valparaíso	Valparaíso	Puchuncaví	0	0	0	0	0	0	0	0	0	0	0	1	0
Valparaíso	Valparaíso	Quintero	0	0	0	0	0	0	0	0	0	0	0	1	0
Valparaíso	Valparaíso	Valparaíso	0	3	0	0	0	0	0	0	0	0	3	296655	1.01128
Valparaíso	Valparaíso	Viña del Mar	0	0	0	0	0	0	0	0	0	0	0	1	0
Valparaíso	Marga Marga	Limache	0	0	0	0	0	0	0	0	0	0	0	1	0
Valparaíso	Marga Marga	Olmué	0	0	0	0	0	0	0	0	0	0	0	1	0
Valparaíso	Marga Marga	Quilpué	0	0	0	0	0	0	0	0	0	0	0	1	0
Valparaíso	Marga Marga	Villa Alemana	0	0	0	0	0	0	0	0	0	0	0	1	0
XIII													24	7112808	0.337419
Metropolitana	Chacabuco	Colina	0	0	0	0	0	0	0	0	0	0	0	1	0
Metropolitana	Chacabuco	Lampa	0	0	0	0	0	0	0	0	0	0	0	1	0
Metropolitana	Chacabuco	Til Til	0	0	0	0	0	0	0	0	0	0	0	1	0
Metropolitana	Cordillera	Pirque	0	0	0	0	0	0	0	0	0	0	0	1	0
Metropolitana	Cordillera	Puente Alto	0	0	0	1	0	0	0	0	0	0	1	586106	0.170618
Metropolitana	Cordillera	San José de Maipo	0	0	0	0	0	0	0	0	0	0	0	1	0
Metropolitana	Maipo	Buin	0	0	0	0	0	0	0	0	0	0	0	1	0
Metropolitana	Maipo	Calera de Tango	0	0	0	3	0	0	0	0	0	0	3	25392	11.8147
Metropolitana	Maipo	Paine	0	0	0	0	0	0	0	0	0	0	0	1	0
Metropolitana	Maipo	San Bernardo	0	0	0	1	0	0	1	1	0	0	3	301313	0.995642
Metropolitana	Melipilla	Alhué	0	0	0	0	0	0	0	0	0	0	0	1	0
Metropolitana	Melipilla	Curacaví	0	0	0	0	0	0	0	0	0	0	0	1	0
Metropolitana	Melipilla	María Pinto	0	0	0	0	0	0	0	0	0	0	0	1	0
Metropolitana	Melipilla	Melipilla	0	0	0	1	0	0	0	0	0	0	1	123627	0.808885
Metropolitana	Melipilla	San Pedro	0	0	0	0	0	0	0	0	0	0	0	1	0
Metropolitana	Santiago	Cerrillos	0	0	0	1	0	0	0	0	0	0	1	80832	1.23713
Metropolitana	Santiago	Cerro Navia	0	0	0	0	0	0	0	0	0	0	0	1	0
Metropolitana	Santiago	Conchalí	0	0	0	0	0	0	0	0	0	0	0	1	0
Metropolitana	Santiago	El Bosque	0	0	0	0	0	0	0	0	0	0	0	1	0
Metropolitana	Santiago	Estación Central	0	0	0	0	0	0	0	0	0	0	0	1	0
Metropolitana	Santiago	Huechuraba	0	0	0	0	0	0	0	0	0	0	0	1	0
Metropolitana	Santiago	Independencia	0	0	0	0	0	0	0	0	0	0	0	1	0
Metropolitana	Santiago	La Cisterna	0	0	0	0	0	0	0	0	0	0	0	1	0
Metropolitana	Santiago	La Granja	0	0	0	0	0	0	0	0	0	0	0	1	0
Metropolitana	Santiago	La Florida	0	0	0	2	0	0	0	0	0	0	2	366916	0.545084
Metropolitana	Santiago	La Pintana	0	0	0	1	0	0	0	0	3	0	4	177335	2.25562
Metropolitana	Santiago	La Reina	0	0	0	0	0	0	0	0	0	0	0	1	0
Metropolitana	Santiago	Las Condes	0	0	0	0	0	0	0	0	0	0	0	1	0
Metropolitana	Santiago	Lo Barnechea	0	0	0	0	0	0	0	0	0	0	0	1	0
Metropolitana	Santiago	Lo Espejo	0	0	0	0	0	0	0	0	0	0	0	1	0
Metropolitana	Santiago	Lo Prado	0	0	0	0	0	0	0	0	0	0	0	1	0
Metropolitana	Santiago	Macul	0	0	0	0	0	0	0	0	0	0	0	1	0
Metropolitana	Santiago	Maipú	0	0	0	1	0	0	0	0	0	0	1	521627	0.191708
Metropolitana	Santiago	Ñuñoa	0	0	0	0	0	0	0	0	0	0	0	1	0
Metropolitana	Santiago	Pedro Aguirre Cerda	0	0	0	1	0	0	0	0	0	0	1	101174	0.988396
Metropolitana	Santiago	Peñalolén	0	0	0	0	0	0	0	0	0	0	0	1	0
Metropolitana	Santiago	Providencia	0	0	0	0	0	0	0	0	0	0	0	1	0
Metropolitana	Santiago	Pudahuel	0	0	0	1	0	0	0	0	0	0	1	230293	0.434229
Metropolitana	Santiago	Quilicura	0	0	0	0	1	0	0	0	0	0	1	210410	0.475263
Metropolitana	Santiago	Quinta Normal	0	0	0	0	0	0	0	0	0	0	0	1	0
Metropolitana	Santiago	Recoleta	0	0	0	0	0	0	0	0	0	0	0	1	0
Metropolitana	Santiago	Renca	0	0	0	0	5	0	0	0	0	0	5	147151	3.39787
Metropolitana	Santiago	San Miguel	0	0	0	0	0	0	0	0	0	0	0	1	0
Metropolitana	Santiago	San Joaquín	0	0	0	0	0	0	0	0	0	0	0	1	0
Metropolitana	Santiago	San Ramón	0	0	0	0	0	0	0	0	0	0	0	1	0
Metropolitana	Santiago	Santiago	0	0	0	0	0	0	0	0	0	0	0	1	0
Metropolitana	Santiago	Vitacura	0	0	0	0	0	0	0	0	0	0	0	1	0
Metropolitana	Talagante	El Monte	0	0	0	0	0	0	0	0	0	0	0	1	0
Metropolitana	Talagante	Isla de Maipo	0	0	0	0	0	0	0	0	0	0	0	1	0
Metropolitana	Talagante	Padre Hurtado	0	0	0	0	0	0	0	0	0	0	0	1	0
Metropolitana	Talagante	Peñaflor	0	0	0	0	0	0	0	0	0	0	0	1	0
Metropolitana	Talagante	Talagante	0	0	0	0	0	0	0	0	0	0	0	1	0
VI													26	914555	2.84291
Bdo. O'higgins	Cachapoal	Rancagua	0	0	0	0	0	0	0	0	0	0	0	1	0
Bdo. O'higgins	Cachapoal	Codegua	0	0	0	0	0	0	0	0	0	0	0	1	0
Bdo. O'higgins	Cachapoal	Coinco	0	0	0	0	0	0	0	0	0	0	0	1	0
Bdo. O'higgins	Cachapoal	Coltauco	0	0	0	0	0	0	0	0	0	0	0	1	0
Bdo. O'higgins	Cachapoal	Doñihue	0	0	0	0	0	0	0	0	0	0	0	1	0
Bdo. O'higgins	Cachapoal	Graneros	0	0	0	0	0	0	0	0	0	0	0	1	0
Bdo. O'higgins	Cachapoal	Las Cabras	0	0	0	0	0	0	0	0	0	0	0	1	0
Bdo. O'higgins	Cachapoal	Machalí	0	0	0	0	0	0	0	0	0	0	0	1	0
Bdo. O'higgins	Cachapoal	Malloa	0	0	0	0	0	0	0	0	0	0	0	1	0
Bdo. O'higgins	Cachapoal	Mostazal	0	0	0	0	0	0	0	0	0	0	0	1	0
Bdo. O'higgins	Cachapoal	Olivar	0	0	0	0	0	0	0	0	0	0	0	1	0
Bdo. O'higgins	Cachapoal	Peumo	0	0	0	0	0	0	0	0	0	0	0	1	0
Bdo. O'higgins	Cachapoal	Pichidegua	0	0	0	14	0	0	0	0	0	0	14	19714	71.0155
Bdo. O'higgins	Cachapoal	Quinta de Tilcoco	0	0	0	0	0	0	0	0	0	0	0	1	0
Bdo. O'higgins	Cachapoal	Rengo	0	0	0	0	0	0	0	0	0	0	0	1	0
Bdo. O'higgins	Cachapoal	Requínoa	0	0	0	0	0	0	0	12	0	0	12	27968	42.9062
Bdo. O'higgins	Cachapoal	San Vicente	0	0	0	0	0	0	0	0	0	0	0	1	0
Bdo. O'higgins	Cardenal Caro	Pichilemu	0	0	0	0	0	0	0	0	0	0	0	1	0
Bdo. O'higgins	Cardenal Caro	La Estrella	0	0	0	0	0	0	0	0	0	0	0	1	0
Bdo. O'higgins	Cardenal Caro	Litueche	0	0	0	0	0	0	0	0	0	0	0	1	0
Bdo. O'higgins	Cardenal Caro	Marchigue	0	0	0	0	0	0	0	0	0	0	0	1	0
Bdo. O'higgins	Cardenal Caro	Navidad	0	0	0	0	0	0	0	0	0	0	0	1	0
Bdo. O'higgins	Cardenal Caro	Paredones	0	0	0	0	0	0	0	0	0	0	0	1	0
Bdo. O'higgins	Colchagua	San Fernando	0	0	0	0	0	0	0	0	0	0	0	1	0
Bdo. O'higgins	Colchagua	Chépica	0	0	0	0	0	0	0	0	0	0	0	1	0
Bdo. O'higgins	Colchagua	Chimbarongo	0	0	0	0	0	0	0	0	0	0	0	1	0
Bdo. O'higgins	Colchagua	Lolol	0	0	0	0	0	0	0	0	0	0	0	1	0
Bdo. O'higgins	Colchagua	Nancagua	0	0	0	0	0	0	0	0	0	0	0	1	0
Bdo. O'higgins	Colchagua	Palmilla	0	0	0	0	0	0	0	0	0	0	0	1	0
Bdo. O'higgins	Colchagua	Peralillo	0	0	0	0	0	0	0	0	0	0	0	1	0
Bdo. O'higgins	Colchagua	Placilla	0	0	0	0	0	0	0	0	0	0	0	1	0
Bdo. O'higgins	Colchagua	Pumanque	0	0	0	0	0	0	0	0	0	0	0	1	0
Bdo. O'higgins	Colchagua	Santa Cruz	0	0	0	0	0	0	0	0	0	0	0	1	0
VII													0	1044950	0
Maule	Talca	Talca	0	0	0	0	0	0	0	0	0	0	0	1	0
Maule	Talca	Constitución	0	0	0	0	0	0	0	0	0	0	0	1	0
Maule	Talca	Curepto	0	0	0	0	0	0	0	0	0	0	0	1	0
Maule	Talca	Empedrado	0	0	0	0	0	0	0	0	0	0	0	1	0
Maule	Talca	Maule	0	0	0	0	0	0	0	0	0	0	0	1	0
Maule	Talca	Pelarco	0	0	0	0	0	0	0	0	0	0	0	1	0
Maule	Talca	Pencahue	0	0	0	0	0	0	0	0	0	0	0	1	0
Maule	Talca	Río Claro	0	0	0	0	0	0	0	0	0	0	0	1	0
Maule	Talca	San Clemente	0	0	0	0	0	0	0	0	0	0	0	1	0
Maule	Talca	San Rafael	0	0	0	0	0	0	0	0	0	0	0	1	0
Maule	Cauquenes	Cauquenes	0	0	0	0	0	0	0	0	0	0	0	1	0
Maule	Cauquenes	Chanco	0	0	0	0	0	0	0	0	0	0	0	1	0
Maule	Cauquenes	Pelluhue	0	0	0	0	0	0	0	0	0	0	0	1	0
Maule	Curicó	Curicó	0	0	0	0	0	0	0	0	0	0	0	1	0
Maule	Curicó	Hualañé	0	0	0	0	0	0	0	0	0	0	0	1	0
Maule	Curicó	Licantén	0	0	0	0	0	0	0	0	0	0	0	1	0
Maule	Curicó	Molina	0	0	0	0	0	0	0	0	0	0	0	1	0
Maule	Curicó	Rauco	0	0	0	0	0	0	0	0	0	0	0	1	0
Maule	Curicó	Romeral	0	0	0	0	0	0	0	0	0	0	0	1	0
Maule	Curicó	Sagrada Familia	0	0	0	0	0	0	0	0	0	0	0	1	0
Maule	Curicó	Teno	0	0	0	0	0	0	0	0	0	0	0	1	0
Maule	Curicó	Vichuquén	0	0	0	0	0	0	0	0	0	0	0	1	0
Maule	Linares	Linares	0	0	0	0	0	0	0	0	0	0	0	1	0
Maule	Linares	Colbún	0	0	0	0	0	0	0	0	0	0	0	1	0
Maule	Linares	Longaví	0	0	0	0	0	0	0	0	0	0	0	1	0
Maule	Linares	Parral	0	0	0	0	0	0	0	0	0	0	0	1	0
Maule	Linares	Retiro	0	0	0	0	0	0	0	0	0	0	0	1	0
Maule	Linares	San Javier	0	0	0	0	0	0	0	0	0	0	0	1	0
Maule	Linares	Villa Alegre	0	0	0	0	0	0	0	0	0	0	0	1	0
Maule	Linares	Yerbas Buenas	0	0	0	0	0	0	0	0	0	0	0	1	0
XVI													1	480609	0.208069
Ñuble	Itata	Cobquecura	0	0	0	0	0	0	0	0	0	0	0	1	0
Ñuble	Itata	Coelemu	0	0	0	0	0	0	0	0	0	0	0	1	0
Ñuble	Itata	Ninhue	0	0	0	0	0	0	0	0	0	0	0	1	0
Ñuble	Itata	Portezuelo	0	0	0	0	0	0	0	0	0	0	0	1	0
Ñuble	Itata	Quirihue	0	0	0	0	0	0	0	0	0	0	0	1	0
Ñuble	Itata	Ránquil	0	0	0	0	0	0	0	0	0	0	0	1	0
Ñuble	Itata	Treguaco	0	0	0	0	0	0	0	0	0	0	0	1	0
Ñuble	Punilla	San Carlos	0	0	0	0	0	0	0	0	0	0	0	1	0
Ñuble	Punilla	Coihueco	0	0	0	0	0	0	0	0	0	0	0	1	0
Ñuble	Punilla	San Nicolás	0	0	0	0	0	0	0	0	0	0	0	1	0
Ñuble	Punilla	Ñiquén	0	0	0	0	0	0	0	0	0	0	0	1	0
Ñuble	Punilla	San Fabián	0	0	0	0	0	0	0	0	0	0	0	1	0
Ñuble	Diguillín	Bulnes	0	0	0	0	0	0	0	0	0	0	0	1	0
Ñuble	Diguillín	Chillán	0	0	0	0	0	0	0	0	0	0	0	1	0
Ñuble	Diguillín	Chillán Viejo	0	0	0	0	0	0	0	0	0	0	0	1	0
Ñuble	Diguillín	El Carmen	0	0	0	0	0	0	0	0	0	0	0	1	0
Ñuble	Diguillín	Pemuco	0	0	0	0	0	0	0	1	0	0	1	8448	11.8371
Ñuble	Diguillín	Pinto	0	0	0	0	0	0	0	0	0	0	0	1	0
Ñuble	Diguillín	Quillón	0	0	0	0	0	0	0	0	0	0	0	1	0
Ñuble	Diguillín	San Ignacio	0	0	0	0	0	0	0	0	0	0	0	1	0
Ñuble	Diguillín	Yungay	0	0	0	0	0	0	0	0	0	0	0	1	0
VIII													5	1556805	0.321171
Biobío	Concepción	Concepción	0	0	0	0	0	0	0	0	0	0	0	1	0
Biobío	Concepción	Coronel	0	0	0	0	0	0	0	0	0	0	0	1	0
Biobío	Concepción	Chiguayante	0	0	0	0	0	0	0	0	0	0	0	1	0
Biobío	Concepción	Florida	0	0	0	0	0	0	0	0	0	0	0	1	0
Biobío	Concepción	Hualqui	0	0	0	0	0	0	0	0	0	0	0	1	0
Biobío	Concepción	Lota	0	0	0	0	0	0	0	0	0	0	0	1	0
Biobío	Concepción	Penco	0	0	0	0	0	0	0	0	0	0	0	1	0
Biobío	Concepción	San Pedro de la Paz	0	0	0	0	0	0	0	0	0	0	0	1	0
Biobío	Concepción	Santa Juana	0	0	0	0	0	0	0	0	0	0	0	1	0
Biobío	Concepción	Talcahuano	0	0	0	0	0	0	0	0	0	0	0	1	0
Biobío	Concepción	Tomé	0	0	0	0	0	0	0	0	0	0	0	1	0
Biobío	Concepción	Hualpen	0	0	0	0	0	0	0	0	0	0	0	1	0
Biobío	Arauco	Lebu	0	0	0	0	0	0	0	0	0	0	0	1	0
Biobío	Arauco	Arauco	0	0	0	0	0	0	0	0	0	0	0	1	0
Biobío	Arauco	Cañete	0	0	0	0	0	0	0	0	0	0	0	1	0
Biobío	Arauco	Contulmo	0	0	0	0	0	0	0	0	0	0	0	1	0
Biobío	Arauco	Curanilahue	0	0	0	0	0	0	0	0	0	0	0	1	0
Biobío	Arauco	Los Alamos	0	0	0	0	0	0	0	0	0	0	0	1	0
Biobío	Arauco	Tirúa	0	0	0	0	0	0	0	0	0	0	0	1	0
Biobío	Biobío	Los Angeles	0	0	0	0	0	0	0	0	0	0	0	1	0
Biobío	Biobío	Antuco	0	0	0	0	0	0	0	0	0	0	0	1	0
Biobío	Biobío	Cabrero	0	0	0	0	0	0	0	0	0	0	0	1	0
Biobío	Biobío	Laja	0	1	0	0	0	0	0	0	0	0	1	22389	4.46648
Biobío	Biobío	Mulchén	0	0	0	0	0	0	0	0	0	0	0	1	0
Biobío	Biobío	Nacimiento	0	0	0	0	0	0	0	0	0	0	0	1	0
Biobío	Biobío	Negrete	0	0	0	0	0	0	0	0	0	0	0	1	0
Biobío	Biobío	Quilaco	0	0	0	0	0	0	0	0	0	0	0	1	0
Biobío	Biobío	Quilleco	0	0	0	0	0	0	0	0	0	0	0	1	0
Biobío	Biobío	San Rosendo	0	0	0	0	0	0	0	0	0	0	0	1	0
Biobío	Biobío	Santa Bárbara	0	4	0	0	0	0	0	0	0	0	4	13773	29.0423
Biobío	Biobío	Tucapel	0	0	0	0	0	0	0	0	0	0	0	1	0
Biobío	Biobío	Yumbel	0	0	0	0	0	0	0	0	0	0	0	1	0
Biobío	Biobío	Alto Biobío	0	0	0	0	0	0	0	0	0	0	0	1	0
IX													148	957224	15.4614
Araucanía	Cautín	Temuco	0	1	0	4	3	0	0	0	0	0	8	282415	2.83271
Araucanía	Cautín	Carahue	0	0	0	0	0	0	0	0	0	0	0	1	0
Araucanía	Cautín	Cunco	0	0	0	0	0	0	0	0	0	0	0	1	0
Araucanía	Cautín	Curarrehue	0	0	0	0	0	0	0	0	4	0	4	7489	53.4117
Araucanía	Cautín	Freire	0	0	0	0	0	0	0	0	0	0	0	1	0
Araucanía	Cautín	Galvarino	0	0	0	0	1	0	0	0	3	17	21	11996	175.058
Araucanía	Cautín	Gorbea	0	0	0	0	0	0	0	0	0	10	10	14414	69.377
Araucanía	Cautín	Lautaro	0	0	0	1	1	0	0	0	0	4	6	38013	15.7841
Araucanía	Cautín	Loncoche	0	0	0	0	1	0	0	0	0	0	1	23612	4.23513
Araucanía	Cautín	Melipeuco	0	0	0	0	0	0	0	0	0	0	0	1	0
Araucanía	Cautín	Nueva Imperial	0	0	0	0	0	1	1	0	0	19	21	32510	64.5955
Araucanía	Cautín	Padre Las Casas	0	2	0	0	0	0	1	1	8	0	12	76126	15.7633
Araucanía	Cautín	Perquenco	0	0	0	0	0	0	0	0	0	5	5	6905	72.4113
Araucanía	Cautín	Pitrufquén	0	0	0	0	0	0	0	0	0	4	4	24837	16.105
Araucanía	Cautín	Pucón	0	0	0	0	0	0	0	0	0	0	0	1	0
Araucanía	Cautín	Saavedra	0	5	0	0	2	0	0	0	0	0	7	12450	56.2249
Araucanía	Cautín	Teodoro Scmidt	0	0	0	0	0	0	0	0	0	0	0	1	0
Araucanía	Cautín	Toltén	0	0	0	0	0	0	0	0	0	0	0	1	0
Araucanía	Cautín	Vilcún	0	1	0	0	0	1	0	0	0	0	2	28151	7.10454
Araucanía	Cautín	Villarrica	0	0	0	0	0	0	0	0	0	0	0	1	0
Araucanía	Cautín	Cholchol	0	0	0	0	0	0	0	0	2	19	21	11611	180.863
Araucanía	Malleco	Angol	0	0	0	1	0	0	0	0	0	0	1	53262	1.87751
Araucanía	Malleco	Collipulli	0	0	0	0	0	0	0	0	0	0	0	1	0
Araucanía	Malleco	Curacautín	0	0	0	0	0	0	0	0	0	0	0	1	0
Araucanía	Malleco	Ercilla	0	0	0	0	0	0	0	0	0	2	2	7733	25.8632
Araucanía	Malleco	Lonquimay	0	0	0	0	0	0	0	0	0	0	0	1	0
Araucanía	Malleco	Los Sauces	0	0	0	0	0	0	0	0	0	2	2	7265	27.5292
Araucanía	Malleco	Lumaco	0	0	0	0	0	0	1	4	0	0	5	9548	52.367
Araucanía	Malleco	Purén	0	1	0	4	2	3	0	0	0	0	10	11779	84.8969
Araucanía	Malleco	Renaico	0	0	0	0	0	0	0	0	0	0	0	1	0
Araucanía	Malleco	Traiguén	0	0	0	0	0	0	0	0	0	6	6	18843	31.8421
Araucanía	Malleco	Victoria	0	0	0	0	0	0	0	0	0	0	0	1	0
XIV													28	384837	7.27581
Los Ríos	Valdivia	Valdivia	0	0	0	0	0	0	0	0	0	1	1	166080	0.602119
Los Ríos	Valdivia	Corral	0	0	0	0	0	0	0	0	0	0	0	1	0
Los Ríos	Valdivia	Lanco	0	0	0	0	0	0	0	0	0	0	0	1	0
Los Ríos	Valdivia	Los Lagos	0	0	0	0	0	0	0	0	0	0	0	1	0
Los Ríos	Valdivia	Máfil	0	0	0	0	0	0	0	0	0	0	0	1	0
Los Ríos	Valdivia	Mariquina	0	0	0	0	0	0	0	0	0	0	0	1	0
Los Ríos	Valdivia	Paillaco	0	0	0	0	0	0	0	0	0	0	0	1	0
Los Ríos	Valdivia	Panguipulli	0	0	0	0	0	0	0	0	0	1	1	34539	2.89528
Los Ríos	Ranco	La Unión	0	1	0	0	0	0	0	21	2	1	25	38036	65.7272
Los Ríos	Ranco	Futrono	0	0	0	0	0	0	0	0	0	0	0	1	0
Los Ríos	Ranco	Lago Ranco	0	0	0	0	0	0	0	0	0	0	0	1	0
Los Ríos	Ranco	Río Bueno	0	0	0	0	0	0	0	0	0	1	1	31372	3.18756
X													43	828708	5.1888
Los Lagos	Llanquihue	Puerto Montt	0	1	0	1	0	0	0	0	0	0	2	245902	0.813332
Los Lagos	Llanquihue	Calbuco	0	0	0	0	0	0	0	0	0	0	0	1	0
Los Lagos	Llanquihue	Cochamó	0	0	0	0	0	0	0	0	0	0	0	1	0
Los Lagos	Llanquihue	Fresia	0	0	0	0	0	0	0	0	0	0	0	1	0
Los Lagos	Llanquihue	Frutillar	0	0	0	0	0	0	0	0	0	0	0	1	0
Los Lagos	Llanquihue	Los Muermos	0	0	0	0	0	0	0	0	0	0	0	1	0
Los Lagos	Llanquihue	Llanquihue	0	0	0	0	0	0	0	0	0	0	0	1	0
Los Lagos	Llanquihue	Maullín	0	0	0	0	0	0	0	0	0	0	0	1	0
Los Lagos	Llanquihue	Puerto Varas	0	0	0	0	0	0	0	0	0	0	0	1	0
Los Lagos	Chiloé	Castro	0	0	0	0	0	0	0	1	0	0	1	43807	2.28274
Los Lagos	Chiloé	Ancud	0	0	0	0	0	0	0	0	0	0	0	1	0
Los Lagos	Chiloé	Chonchi	0	0	0	0	0	0	0	0	0	0	0	1	0
Los Lagos	Chiloé	Curaco de Vélez	0	0	0	0	0	0	0	0	0	0	0	1	0
Los Lagos	Chiloé	Dalcahue	0	0	0	0	0	0	0	0	0	0	0	1	0
Los Lagos	Chiloé	Puqueldón	0	0	0	0	0	0	0	0	0	0	0	1	0
Los Lagos	Chiloé	Queilén	0	0	0	0	0	0	0	0	0	0	0	1	0
Los Lagos	Chiloé	Quellón	0	20	0	0	0	0	0	0	0	0	20	27192	73.551
Los Lagos	Chiloé	Quemchi	0	0	0	0	0	0	0	0	0	0	0	1	0
Los Lagos	Chiloé	Quinchao	0	0	0	0	0	0	0	1	0	0	1	8088	12.364
Los Lagos	Osorno	Osorno	0	0	0	0	0	0	0	0	0	0	0	1	0
Los Lagos	Osorno	Puerto Octay	0	0	0	0	0	0	0	0	0	0	0	1	0
Los Lagos	Osorno	Purranque	0	0	0	0	0	0	0	0	0	0	0	1	0
Los Lagos	Osorno	Puyehue	0	0	0	0	0	0	0	0	0	0	0	1	0
Los Lagos	Osorno	Río Negro	0	0	0	0	0	0	0	0	0	0	0	1	0
Los Lagos	Osorno	San Juan de la Costa	0	0	0	0	0	0	0	0	19	0	19	7512	252.929
Los Lagos	Osorno	San Pablo	0	0	0	0	0	0	0	0	0	0	0	1	0
Los Lagos	Palena	Chaitén	0	0	0	0	0	0	0	0	0	0	0	1	0
Los Lagos	Palena	Futaleufú	0	0	0	0	0	0	0	0	0	0	0	1	0
Los Lagos	Palena	Hualaihué	0	0	0	0	0	0	0	0	0	0	0	1	0
Los Lagos	Palena	Palena	0	0	0	0	0	0	0	0	0	0	0	1	0
XI													4	103158	3.87755
Aisén	Coihaique	Coihaique	0	0	0	0	0	0	0	0	0	0	0	1	0
Aisén	Coihaique	Lago Verde	0	0	0	0	0	0	4	0	0	0	4	852	469.484
Aisén	Aisén	Aisén	0	0	0	0	0	0	0	0	0	0	0	1	0
Aisén	Aisén	Cisnes	0	0	0	0	0	0	0	0	0	0	0	1	0
Aisén	Aisén	Guaitecas	0	0	0	0	0	0	0	0	0	0	0	1	0
Aisén	Capitán Prat	Cochrane	0	0	0	0	0	0	0	0	0	0	0	1	0
Aisén	Capitán Prat	O'Higgins	0	0	0	0	0	0	0	0	0	0	0	1	0
Aisén	Capitán Prat	Tortel	0	0	0	0	0	0	0	0	0	0	0	1	0
Aisén	General Carrera	Chile Chico	0	0	0	0	0	0	0	0	0	0	0	1	0
Aisén	General Carrera	Río Ibáñez	0	0	0	0	0	0	0	0	0	0	0	1	0
XII													0	166533	0
Magallanes	Magallanes	Punta Arenas	0	0	0	0	0	0	0	0	0	0	0	1	0
Magallanes	Magallanes	Laguna Blanca	0	0	0	0	0	0	0	0	0	0	0	1	0
Magallanes	Magallanes	Río Verde	0	0	0	0	0	0	0	0	0	0	0	1	0
Magallanes	Magallanes	San Gregorio	0	0	0	0	0	0	0	0	0	0	0	1	0
Magallanes	Antártica Chilena	Cabo de Hornos	0	0	0	0	0	0	0	0	0	0	0	1	0
Magallanes	Antártica Chilena	Antártica	0	0	0	0	0	0	0	0	0	0	0	1	0
Magallanes	Tierra Del Fuego	Porvenir	0	0	0	0	0	0	0	0	0	0	0	1	0
Magallanes	Tierra Del Fuego	Primavera	0	0	0	0	0	0	0	0	0	0	0	1	0
Magallanes	Tierra Del Fuego	Timaukel	0	0	0	0	0	0	0	0	0	0	0	1	0
Magallanes	Ultima Esperanza	Natales	0	0	0	0	0	0	0	0	0	0	0	1	0
Magallanes	Ultima Esperanza	Torres Del Paine	0	0	0	0	0	0	0	0	0	0	0	1	0
